# Supplementary material for: Determination of phenolic compounds in extracts of Amazonian medicinal plants by liquid chromatography-electrospray tandem mass spectrometry
Source: Royal Society of Chemistry journal article supplement (doi:10.1039/c6ay02937j), 2017-01-01
Supplement: c6ay02937j1.pdf [file c6ay02937j1.pdf]

**Determination of phenolic compounds in extracts of  
Amazonian medicinal plants by liquid chromatography-  
electrospray tandem mass spectrometry**

Henrique Faccin<sup>a,b</sup>, Roberta Fabricio Loose<sup>a</sup>, Carine Viana<sup>c</sup>, Osmar A. Lameira<sup>d</sup>,  
Leandro Machado de Carvalho<sup>a,b,c\*</sup>

*<sup>a</sup>Department of Chemistry, Federal University of Santa Maria, Santa Maria, RS, 97105-900, Brazil*

*<sup>b</sup>Graduate Program in Chemistry, Center of Natural Sciences, Federal University of Santa Maria, Santa Maria, RS, 97105-900, Brazil*

*<sup>c</sup>Graduate Program in Pharmaceutical Sciences, Center of Health Sciences, Federal University of Santa Maria, Santa Maria, RS, 97105-900, Brazil*

*<sup>d</sup>Laboratório de Agrobiotecnologia, EMBRAPA Amazônia Oriental, Belém, PA, Brazil.*

---

\*Corresponding author. Tel.: +55-5532208870

E-mail address: [leandrocarvalho@pq.cnpq.br](mailto:leandrocarvalho@pq.cnpq.br) (L. M. de Carvalho)

## Electronic Supplementary Information (ESI)

**Table S1**

Extraction yields (w/w) of the ethanolic extracts obtained from the six studied plant species.

| Plant species                                         | Extraction yields (% w/w)     |                               |                               |
|-------------------------------------------------------|-------------------------------|-------------------------------|-------------------------------|
|                                                       | <i>1<sup>st</sup> harvest</i> | <i>2<sup>nd</sup> harvest</i> | <i>3<sup>rd</sup> harvest</i> |
| <i>Cecropia palmata</i>                               | 22.05                         | 0.47                          | 3.53                          |
| <i>Cecropia obtusa</i>                                | 10.44                         | 1.21                          | 1.32                          |
| <i>Bauhinia variegata</i> var. <i>variegata</i>       | 4.60                          | 3.44                          | 8.55                          |
| <i>Bauhinia variegata</i> var. <i>alboflava</i>       | 6.87                          | 2.76                          | 10.97                         |
| <i>Mansoa alliacea</i>                                | 4.85                          | 1.57                          | 8.39                          |
| <i>Connarus perrottetii</i> var. <i>angustifolius</i> | 8.76                          | 9.50                          | 6.50                          |

**Table S2**

Concentrations of phenolic compounds in *Cecropia palmata* determined by UHPLC-ESI-MS/MS using infusions and ethanolic extracts of three harvests. The values are given in  $\mu\text{g}\cdot\text{g}^{-1}$  of plant followed by standard deviation of the concentration ( $\mu\text{g}\cdot\text{g}^{-1}$ ).

| Compound                    | <i>Cecropia palmata</i>       |                               |                               |                               |                               |                               |
|-----------------------------|-------------------------------|-------------------------------|-------------------------------|-------------------------------|-------------------------------|-------------------------------|
|                             | Infusion                      |                               |                               | Ethanolic extract             |                               |                               |
|                             | <i>1<sup>st</sup> harvest</i> | <i>2<sup>nd</sup> harvest</i> | <i>3<sup>rd</sup> harvest</i> | <i>1<sup>st</sup> harvest</i> | <i>2<sup>nd</sup> harvest</i> | <i>3<sup>rd</sup> harvest</i> |
| Gallic acid                 | -                             | -                             | -                             | -                             | -                             | -                             |
| Chlorogenic acid            | 475.0 ± 16.6                  | 359.1 ± 19.9                  | 60.1 ± 1.2                    | 240.2 ± 7.7                   | 1.1 ± 0.03                    | 49.7 ± 1.9                    |
| (+)-catechin                | 24.0 ± 1.7                    | 22.3 ± 0.9                    | 3.7 ± 0.6                     | 33.5 ± 2.5                    | 0.3 ± 0.01                    | 1.1 ± 0.2                     |
| Vanillic acid               | 11.2 ± 2.3                    | 18.5 ± 0.3                    | 10.2 ± 0.9                    | 5.2 ± 2.0                     | 0.3 ± 0.02                    | 2.3 ± 0.4                     |
| Caffeic acid                | 23.0 ± 0.7                    | 14.5 ± 0.7                    | 19.8 ± 0.7                    | 34.4 ± 3.1                    | 1.9 ± 0.1                     | 5.8 ± 0.3                     |
| 6-hydroxycoumarin           | -                             | -                             | -                             | -                             | -                             | -                             |
| <i>p</i> -coumaric acid     | 4.2 ± 0.4                     | 3.6 ± 0.1                     | 4.9 ± 0.2                     | 17.5 ± 1.0                    | 0.8 ± 0.02                    | 0.9 ± 0.02                    |
| Ferulic acid                | 3.4 ± 0.7                     | 4.1 ± 0.6                     | 2.2 ± 0.8                     | 5.0 ± 1.0                     | 0.3 ± 0.02                    | 0.8 ± 0.1                     |
| Rutin                       | < ILOQ                        | < ILOQ                        | 1.0 ± 0.2                     | 153.2 ± 7.3                   | < ILOQ                        | < ILOQ                        |
| 4-Hydroxycoumarin           | -                             | -                             | -                             | -                             | -                             | -                             |
| Rosmarinic acid             | -                             | -                             | -                             | -                             | -                             | -                             |
| Quercitrin                  | 0.2 ± 0.1                     | -                             | 0.1 ± 0.02                    | 23.1 ± 1.1                    | -                             | < ILOQ                        |
| Myricetin                   | -                             | -                             | -                             | -                             | -                             | -                             |
| Fisetin                     | -                             | -                             | -                             | -                             | -                             | -                             |
| Resveratrol                 | -                             | -                             | -                             | -                             | -                             | -                             |
| 3-acetylcoumarin            | -                             | -                             | -                             | -                             | -                             | -                             |
| <i>trans</i> -cinnamic acid | 5.0 ± 0.8                     | 2.5 ± 0.3                     | 2.9 ± 0.4                     | 1.3 ± 0.9                     | 0.03 ± 0.01                   | 0.5 ± 0.2                     |
| Quercetin                   | < ILOQ                        | < ILOQ                        | < ILOQ                        | 42.8 ± 2.7                    | < ILOQ                        | 0.4 ± 0.2                     |
| Luteolin                    | -                             | -                             | -                             | 5.6 ± 0.4                     | 0.02 ± 0.004                  | 0.3 ± 0.04                    |
| Apigenin                    | -                             | -                             | -                             | 24.4 ± 1.6                    | -                             | -                             |
| Kaempferol                  | -                             | -                             | -                             | < ILOQ                        | -                             | -                             |
| 3,6-dihydroxyflavone        | -                             | -                             | -                             | -                             | -                             | -                             |
| Chrysin                     | -                             | -                             | -                             | < ILOQ                        | -                             | -                             |
| Galangin                    | -                             | -                             | -                             | -                             | -                             | -                             |

**Table S3**

Concentrations of phenolic compounds in *Cecropia obtusa* determined by UHPLC-ESI-MS/MS using infusions and ethanolic extracts of three harvests. The values are given in  $\mu\text{g}\cdot\text{g}^{-1}$  of plant followed by standard deviation of the concentration ( $\mu\text{g}\cdot\text{g}^{-1}$ ).

| Compound                    | <i>Cecropia obtusa</i>        |                               |                               |                               |                               |                               |
|-----------------------------|-------------------------------|-------------------------------|-------------------------------|-------------------------------|-------------------------------|-------------------------------|
|                             | Infusion                      |                               |                               | Ethanolic extract             |                               |                               |
|                             | <i>1<sup>st</sup> harvest</i> | <i>2<sup>nd</sup> harvest</i> | <i>3<sup>rd</sup> harvest</i> | <i>1<sup>st</sup> harvest</i> | <i>2<sup>nd</sup> harvest</i> | <i>3<sup>rd</sup> harvest</i> |
| Gallic acid                 | -                             | -                             | -                             | -                             | < ILOQ                        | -                             |
| Chlorogenic acid            | 568.2 ± 26.6                  | 287.5 ± 9.2                   | 312.1 ± 8.6                   | 455.8 ± 4.3                   | 8.3 ± 0.3                     | 21.6 ± 0.4                    |
| (+)-catechin                | 66.9 ± 2.7                    | 94.9 ± 4.7                    | 16.1 ± 0.9                    | 24.4 ± 1.7                    | 4.2 ± 0.2                     | 2.8 ± 0.1                     |
| Vanillic acid               | 10.3 ± 1.6                    | 12.8 ± 1.8                    | 4.2 ± 0.8                     | 10.1 ± 2.1                    | 1.3 ± 0.1                     | 0.3 ± 0.1                     |
| Caffeic acid                | 31.9 ± 1.3                    | 21.0 ± 1.3                    | 6.2 ± 0.2                     | 13.8 ± 1.9                    | 4.9 ± 0.2                     | 0.4 ± 0.03                    |
| 6-hydroxycoumarin           | -                             | -                             | -                             | -                             | -                             | -                             |
| <i>p</i> -coumaric acid     | 2.9 ± 0.2                     | 2.3 ± 0.3                     | 1.8 ± 0.1                     | 1.3 ± 0.4                     | 0.7 ± 0.01                    | 0.1 ± 0.01                    |
| Ferulic acid                | 3.2 ± 0.7                     | 2.8 ± 0.6                     | 2.3 ± 0.3                     | 1.6 ± 0.5                     | 0.3 ± 0.04                    | 0.1 ± 0.03                    |
| Rutin                       | 38.0 ± 1.0                    | 45.9 ± 2.0                    | 75.7 ± 1.0                    | 21.9 ± 2.6                    | 1.6 ± 0.05                    | 6.9 ± 0.1                     |
| 4-Hydroxycoumarin           | -                             | -                             | -                             | -                             | -                             | -                             |
| Rosmarinic acid             | -                             | -                             | -                             | -                             | -                             | -                             |
| Quercitrin                  | 3.6 ± 0.2                     | 3.5 ± 0.2                     | -                             | 4.4 ± 0.4                     | 0.2 ± 0.01                    | < ILOQ                        |
| Myricetin                   | < ILOQ                        | -                             | -                             | 38.2 ± 9.5                    | -                             | -                             |
| Fisetin                     | -                             | -                             | -                             | -                             | -                             | -                             |
| Resveratrol                 | -                             | -                             | -                             | -                             | -                             | -                             |
| 3-acetylcoumarin            | -                             | -                             | -                             | -                             | -                             | -                             |
| <i>trans</i> -cinnamic acid | 1.8 ± 0.6                     | 4.1 ± 0.6                     | 4.5 ± 0.5                     | 0.5 ± 0.3                     | 0.1 ± 0.02                    | 0.3 ± 0.1                     |
| Quercetin                   | 2.5 ± 0.5                     | < ILOQ                        | < ILOQ                        | 32.5 ± 2.4                    | 9.9 ± 0.3                     | < ILOQ                        |
| Luteolin                    | < ILOQ                        | < ILOQ                        | -                             | 4.4 ± 0.7                     | 0.7 ± 0.01                    | < ILOQ                        |
| Apigenin                    | -                             | -                             | -                             | 15.3 ± 1.3                    | -                             | -                             |
| Kaempferol                  | -                             | -                             | -                             | -                             | 0.4 ± 0.1                     | -                             |
| 3,6-dihydroxyflavone        | -                             | -                             | -                             | -                             | -                             | -                             |
| Chrysin                     | -                             | -                             | -                             | -                             | -                             | -                             |
| Galangin                    | -                             | -                             | -                             | -                             | -                             | -                             |

**Table S4**

Concentrations of phenolic compounds in *Bauhinia variegata* var. *variegata* determined by UHPLC-ESI-MS/MS using infusions and ethanolic extracts of three harvests. The values are given in  $\mu\text{g}\cdot\text{g}^{-1}$  of plant followed by standard deviation of the concentration ( $\mu\text{g}\cdot\text{g}^{-1}$ ).

| Compound                    | <i>Bauhinia variegata</i> var. <i>variegata</i> |                               |                               |                               |                               |                  |
|-----------------------------|-------------------------------------------------|-------------------------------|-------------------------------|-------------------------------|-------------------------------|------------------|
|                             | Infusion                                        |                               |                               | Ethanolic extract             |                               |                  |
|                             | <i>1<sup>st</sup> harvest</i>                   | <i>2<sup>nd</sup> harvest</i> | <i>3<sup>rd</sup> harvest</i> | <i>1<sup>st</sup> harvest</i> | <i>2<sup>nd</sup> harvest</i> | <i>3 harvest</i> |
| Gallic acid                 | -                                               | < ILOQ                        | < ILOQ                        | -                             | -                             | -                |
| Chlorogenic acid            | 79.6 ± 6.1                                      | 288.0 ± 8.3                   | 384.9 ± 12.2                  | 35.8 ± 2.3                    | 29.4 ± 1.3                    | 100.1 ± 2.2      |
| (+)-catechin                | 12.8 ± 0.9                                      | 56.3 ± 1.4                    | 78.8 ± 2.8                    | 6.8 ± 0.4                     | 4.9 ± 0.3                     | 14.6 ± 0.4       |
| Vanillic acid               | 5.2 ± 0.7                                       | 9.5 ± 0.7                     | 16.9 ± 0.8                    | 1.6 ± 0.4                     | 5.7 ± 0.1                     | 3.8 ± 0.3        |
| Caffeic acid                | 13.1 ± 1.0                                      | 34.3 ± 1.7                    | 27.4 ± 1.7                    | 7.7 ± 0.6                     | 121.1 ± 2.8                   | 22.9 ± 0.6       |
| 6-hydroxycoumarin           | -                                               | -                             | -                             | -                             | -                             | -                |
| <i>p</i> -coumaric acid     | 10.3 ± 0.3                                      | 14.7 ± 0.4                    | 19.8 ± 0.5                    | 3.8 ± 0.1                     | 18.4 ± 0.6                    | 8.6 ± 0.2        |
| Ferulic acid                | 7.8 ± 0.9                                       | 13.0 ± 0.9                    | 10.9 ± 0.6                    | 2.5 ± 0.3                     | 28.7 ± 0.5                    | 6.9 ± 0.2        |
| Rutin                       | 608.1 ± 32.3                                    | 351.1 ± 7.2                   | 2517.3 ± 48.0                 | 176.8 ± 4.3                   | 129.9 ± 4.1                   | 832.9 ± 1.4      |
| 4-Hydroxycoumarin           | -                                               | -                             | -                             | -                             | -                             | -                |
| Rosmarinic acid             | -                                               | -                             | -                             | -                             | -                             | -                |
| Quercitrin                  | 24.5 ± 1.4                                      | 17.2 ± 0.9                    | 158 ± 2.9                     | 9.7 ± 0.5                     | 3.9 ± 0.2                     | 22 ± 0.1         |
| Myricetin                   | -                                               | -                             | -                             | 30.2 ± 5.6                    | -                             | -                |
| Fisetin                     | -                                               | -                             | -                             | -                             | 0.3 ± 0.1                     | -                |
| Resveratrol                 | -                                               | -                             | -                             | -                             | -                             | -                |
| 3-acetylcoumarin            | -                                               | -                             | -                             | -                             | -                             | -                |
| <i>trans</i> -cinnamic acid | 1.4 ± 0.3                                       | 1.8 ± 0.3                     | 3.1 ± 0.6                     | 0.4 ± 0.1                     | 0.9 ± 0.1                     | 0.8 ± 0.3        |
| Quercetin                   | -                                               | < ILOQ                        | < ILOQ                        | 10.5 ± 0.6                    | 99.8 ± 1.5                    | 17.8 ± 0.5       |
| Luteolin                    | -                                               | < ILOQ                        | < ILOQ                        | 0.8 ± 0.1                     | 0.8 ± 0.1                     | 4.6 ± 0.2        |
| Apigenin                    | -                                               | -                             | -                             | 5.0 ± 0.4                     | < ILOQ                        | < ILOQ           |
| Kaempferol                  | -                                               | -                             | -                             | 0.3 ± 0.6                     | 9.3 ± 1.6                     | -                |
| 3,6-dihydroxyflavone        | -                                               | -                             | -                             | -                             | -                             | -                |
| Chrysin                     | -                                               | -                             | -                             | < ILOQ                        | < ILOQ                        | -                |
| Galangin                    | -                                               | -                             | -                             | -                             | -                             | -                |

**Table S5**

Concentrations of phenolic compounds in *Bauhinia variegata* var. *alboflava* determined by UHPLC-ESI-MS/MS using infusions and ethanolic extracts of three harvests. The values are given in  $\mu\text{g}\cdot\text{g}^{-1}$  of plant followed by standard deviation of the concentration ( $\mu\text{g}\cdot\text{g}^{-1}$ ).

| Compound                    | <i>Bauhinia variegata</i> var. <i>alboflava</i> |                               |                               |                               |                               |                               |
|-----------------------------|-------------------------------------------------|-------------------------------|-------------------------------|-------------------------------|-------------------------------|-------------------------------|
|                             | Infusion                                        |                               |                               | Ethanolic extract             |                               |                               |
|                             | <i>1<sup>st</sup> harvest</i>                   | <i>2<sup>nd</sup> harvest</i> | <i>3<sup>rd</sup> harvest</i> | <i>1<sup>st</sup> harvest</i> | <i>2<sup>nd</sup> harvest</i> | <i>3<sup>rd</sup> harvest</i> |
| Gallic acid                 | -                                               | -                             | < ILOQ                        | -                             | -                             | -                             |
| Chlorogenic acid            | 226.7 ± 6.2                                     | 349.7 ± 13                    | 371.5 ± 15.8                  | 27.5 ± 2.5                    | 31.4 ± 1.1                    | 81.3 ± 1.2                    |
| (+)-catechin                | 81.5 ± 4.6                                      | 123.1 ± 5.7                   | 88.8 ± 3.6                    | 8.6 ± 1.3                     | 8.0 ± 0.1                     | 23.0 ± 0.4                    |
| Vanillic acid               | 8.3 ± 1.6                                       | 7.0 ± 1.4                     | 16.0 ± 0.5                    | < ILOQ                        | 3.0 ± 0.3                     | 5.6 ± 0.5                     |
| Caffeic acid                | 33.5 ± 2.4                                      | 48.7 ± 2.3                    | 31.8 ± 1.1                    | 8.3 ± 1.1                     | 39.3 ± 0.8                    | 21.9 ± 0.5                    |
| 6-hydroxycoumarin           | -                                               | -                             | -                             | -                             | -                             | -                             |
| <i>p</i> -coumaric acid     | 19.2 ± 0.6                                      | 27.3 ± 1.2                    | 19.3 ± 0.3                    | 4.8 ± 0.4                     | 10.5 ± 0.2                    | 13.4 ± 0.2                    |
| Ferulic acid                | 12.2 ± 1.0                                      | 10.1 ± 0.9                    | 13.5 ± 0.4                    | 2.1 ± 0.9                     | 9.3 ± 0.2                     | 6.2 ± 0.3                     |
| Rutin                       | 746.2 ± 31.3                                    | 2182.2 ± 29.2                 | 1720.8 ± 40.3                 | 67.0 ± 3.3                    | 274.1 ± 2.0                   | 259.3 ± 1.5                   |
| 4-Hydroxycoumarin           | -                                               | -                             | -                             | -                             | -                             | -                             |
| Rosmarinic acid             | -                                               | -                             | -                             | -                             | -                             | -                             |
| Quercitrin                  | 12.3 ± 0.6                                      | 14.5 ± 0.5                    | 16.6 ± 0.7                    | 3.7 ± 0.1                     | 2.3 ± 0.1                     | 9.1 ± 0.2                     |
| Myricetin                   | < ILOQ                                          | -                             | -                             | -                             | -                             | -                             |
| Fisetin                     | -                                               | -                             | -                             | -                             | < ILOQ                        | -                             |
| Resveratrol                 | -                                               | -                             | -                             | -                             | -                             | -                             |
| 3-acetylcoumarin            | -                                               | -                             | -                             | -                             | -                             | -                             |
| <i>trans</i> -cinnamic acid | 2.9 ± 0.8                                       | 3.3 ± 0.8                     | 4.3 ± 0.6                     | 0.5 ± 0.3                     | 0.6 ± 0.1                     | 1.6 ± 0.3                     |
| Quercetin                   | < ILOQ                                          | < ILOQ                        | 1.2 ± 0.4                     | 18.7 ± 2.3                    | 37.1 ± 1.4                    | 44.2 ± 1.2                    |
| Luteolin                    | < ILOQ                                          | < ILOQ                        | < ILOQ                        | 1.6 ± 0.2                     | 1.1 ± 0.04                    | 2.9 ± 0.2                     |
| Apigenin                    | -                                               | -                             | -                             | 6.7 ± 0.6                     | < ILOQ                        | < ILOQ                        |
| Kaempferol                  | -                                               | -                             | -                             | < ILOQ                        | 4.5 ± 0.6                     | 5.0 ± 1.1                     |
| 3,6-dihydroxyflavone        | -                                               | < ILOQ                        | -                             | -                             | -                             | -                             |
| Chrysin                     | -                                               | -                             | -                             | < ILOQ                        | 0.1 ± 0.02                    | < ILOQ                        |
| Galangin                    | -                                               | -                             | -                             | -                             | -                             | -                             |

**Table S6**

Concentrations of phenolic compounds in *Mansoa alliacea* determined by UHPLC-ESI-MS/MS using infusions and ethanolic extracts of three harvests. The values are given in  $\mu\text{g}\cdot\text{g}^{-1}$  of plant followed by standard deviation of the concentration ( $\mu\text{g}\cdot\text{g}^{-1}$ ).

| Compound                    | <i>Mansoa alliacea</i>        |                               |                               |                               |                               |                               |
|-----------------------------|-------------------------------|-------------------------------|-------------------------------|-------------------------------|-------------------------------|-------------------------------|
|                             | Infusion                      |                               |                               | Ethanolic extract             |                               |                               |
|                             | <i>1<sup>st</sup> harvest</i> | <i>2<sup>nd</sup> harvest</i> | <i>3<sup>rd</sup> harvest</i> | <i>1<sup>st</sup> harvest</i> | <i>2<sup>nd</sup> harvest</i> | <i>3<sup>rd</sup> harvest</i> |
| Gallic acid                 | -                             | < ILOQ                        | < ILOQ                        | -                             | -                             | -                             |
| Chlorogenic acid            | 99.1 ± 3.5                    | 128.8 ± 2.7                   | 63.0 ± 2.4                    | 9.6 ± 0.4                     | 3.3 ± 0.05                    | 18.1 ± 0.6                    |
| (+)-catechin                | -                             | -                             | -                             | -                             | -                             | -                             |
| Vanillic acid               | 16.4 ± 1.4                    | 10.1 ± 0.7                    | 10.1 ± 0.8                    | 2.7 ± 0.4                     | 1.1 ± 0.1                     | 5.4 ± 0.5                     |
| Caffeic acid                | 5.6 ± 0.5                     | 9.4 ± 0.4                     | 4.8 ± 0.2                     | 1.4 ± 0.2                     | 0.9 ± 0.03                    | 2.2 ± 0.1                     |
| 6-hydroxycoumarin           | -                             | -                             | -                             | -                             | -                             | -                             |
| <i>p</i> -coumaric acid     | 34.2 ± 1.9                    | 51.4 ± 1.2                    | 22.4 ± 0.5                    | 16.9 ± 1.1                    | 5.9 ± 0.1                     | 4.8 ± 0.1                     |
| Ferulic acid                | 25.8 ± 0.7                    | 27.7 ± 0.8                    | 32.5 ± 0.9                    | 11.0 ± 0.4                    | 4.2 ± 0.1                     | 12.5 ± 0.2                    |
| Rutin                       | 3.6 ± 0.4                     | 1.6 ± 0.2                     | 8.2 ± 0.5                     | 0.4 ± 0.1                     | 0.2 ± 0.02                    | 4.2 ± 0.1                     |
| 4-Hydroxycoumarin           | -                             | -                             | -                             | -                             | -                             | -                             |
| Rosmarinic acid             | -                             | -                             | -                             | -                             | -                             | -                             |
| Quercitrin                  | -                             | -                             | 0.1 ± 0.04                    | -                             | -                             | 0.1 ± 0.02                    |
| Myricetin                   | -                             | -                             | -                             | -                             | -                             | -                             |
| Fisetin                     | -                             | -                             | < ILOQ                        | -                             | -                             | -                             |
| Resveratrol                 | -                             | -                             | -                             | -                             | -                             | -                             |
| 3-acetylcoumarin            | -                             | -                             | -                             | -                             | -                             | -                             |
| <i>trans</i> -cinnamic acid | 3.7 ± 0.7                     | 10.7 ± 0.8                    | 6.9 ± 0.1                     | 0.5 ± 0.1                     | 0.6 ± 0.1                     | 2.5 ± 0.3                     |
| Quercetin                   | -                             | -                             | -                             | -                             | -                             | < ILOQ                        |
| Luteolin                    | 0.6 ± 0.2                     | 0.4 ± 0.1                     | 0.3 ± 0.1                     | 10.2 ± 0.7                    | 5.6 ± 0.2                     | 1.8 ± 0.1                     |
| Apigenin                    | 5.2 ± 0.2                     | 4.0 ± 0.2                     | 5.2 ± 0.3                     | 8.6 ± 0.4                     | 1.8 ± 0.03                    | 3.8 ± 0.1                     |
| Kaempferol                  | -                             | -                             | -                             | -                             | -                             | -                             |
| 3,6-dihydroxyflavone        | -                             | -                             | -                             | -                             | -                             | -                             |
| Chrysin                     | -                             | -                             | -                             | -                             | -                             | -                             |
| Galangin                    | -                             | -                             | -                             | -                             | -                             | -                             |

**Table S7**

Concentrations of phenolic compounds in *Connarus perrottetii* var. *angustifolius* determined by UHPLC-ESI-MS/MS using infusions and ethanolic extracts of three harvests. The values are given in  $\mu\text{g}\cdot\text{g}^{-1}$  of plant followed by standard deviation of the concentration ( $\mu\text{g}\cdot\text{g}^{-1}$ ).

| Compound                    | <i>Connarus perrottetii</i> var. <i>angustifolius</i> |                               |                               |                               |                               |                               |
|-----------------------------|-------------------------------------------------------|-------------------------------|-------------------------------|-------------------------------|-------------------------------|-------------------------------|
|                             | Infusion                                              |                               |                               | Ethanolic extract             |                               |                               |
|                             | <i>1<sup>st</sup> harvest</i>                         | <i>2<sup>nd</sup> harvest</i> | <i>3<sup>rd</sup> harvest</i> | <i>1<sup>st</sup> harvest</i> | <i>2<sup>nd</sup> harvest</i> | <i>3<sup>rd</sup> harvest</i> |
| Gallic acid                 | 11.6 ± 0.8                                            | 109.8 ± 5.0                   | 65.6 ± 1.3                    | 6.6 ± 1.5                     | 49.2 ± 1.9                    | 44.3 ± 0.9                    |
| Chlorogenic acid            | -                                                     | 2.0 ± 0.7                     | -                             | -                             | 0.7 ± 0.1                     | 0.7 ± 0.1                     |
| (+)-catechin                | 1007.8 ± 10.3                                         | 1773.7 ± 26.9                 | 1236.4 ± 30.1                 | 442.1 ± 31.7                  | 374.1 ± 6.3                   | 258.4 ± 3.5                   |
| Vanillic acid               | 9.2 ± 0.9                                             | 15.2 ± 0.6                    | 18.9 ± 1.2                    | 6.2 ± 1.5                     | 15.9 ± 0.9                    | 14.6 ± 0.4                    |
| Caffeic acid                | -                                                     | -                             | 0.8 ± 0.2                     | < ILOQ                        | -                             | 0.3 ± 0.1                     |
| 6-hydroxycoumarin           | -                                                     | -                             | -                             | -                             | -                             | -                             |
| <i>p</i> -coumaric acid     | 1.7 ± 0.1                                             | 2.4 ± 0.1                     | 8.2 ± 0.2                     | 2.9 ± 0.2                     | 1.7 ± 0.04                    | 6.1 ± 0.2                     |
| Ferulic acid                | 7.3 ± 0.6                                             | 0.9 ± 0.3                     | 2.4 ± 0.5                     | 10.7 ± 1.0                    | 1.0 ± 0.2                     | 1.5 ± 0.2                     |
| Rutin                       | 0.5 ± 0.2                                             | < ILOQ                        | < ILOQ                        | 0.4 ± 0.1                     | -                             | < ILOQ                        |
| 4-Hydroxycoumarin           | -                                                     | -                             | -                             | -                             | -                             | -                             |
| Rosmarinic acid             | -                                                     | -                             | -                             | -                             | -                             | -                             |
| Quercitrin                  | -                                                     | -                             | -                             | -                             | -                             | < ILOQ                        |
| Myricetin                   | -                                                     | -                             | -                             | -                             | 17.8 ± 8.3                    | 5.6 ± 2.7                     |
| Fisetin                     | -                                                     | -                             | -                             | -                             | -                             | -                             |
| Resveratrol                 | -                                                     | -                             | -                             | -                             | -                             | -                             |
| 3-acetylcoumarin            | -                                                     | -                             | -                             | -                             | -                             | -                             |
| <i>trans</i> -cinnamic acid | -                                                     | 0.7 ± 0.2                     | < ILOQ                        | -                             | < ILOQ                        | 0.4 ± 0.1                     |
| Quercetin                   | -                                                     | < ILOQ                        | < ILOQ                        | < ILOQ                        | 11.8 ± 0.2                    | 7.3 ± 0.3                     |
| Luteolin                    | -                                                     | < ILOQ                        | -                             | < ILOQ                        | -                             | -                             |
| Apigenin                    | -                                                     | -                             | -                             | 9.5 ± 0.1                     | -                             | -                             |
| Kaempferol                  | -                                                     | -                             | -                             | -                             | 15.3 ± 1.8                    | 7.6 ± 1.2                     |
| 3,6-dihydroxyflavone        | -                                                     | -                             | -                             | -                             | -                             | -                             |
| Chrysin                     | -                                                     | -                             | -                             | -                             | -                             | -                             |
| Galangin                    | -                                                     | -                             | -                             | -                             | -                             | -                             |
